# Supplementary material for: Synthesis, characterization, and photoresponsive properties of a series of Mo(iv)–Cu(ii) complexes
Source: Royal Society of Chemistry journal article supplement (doi:10.1039/c0dt01213k), 2011-01-01
Supplement: c0dt01213k.pdf [file c0dt01213k.pdf]

## Supporting Information

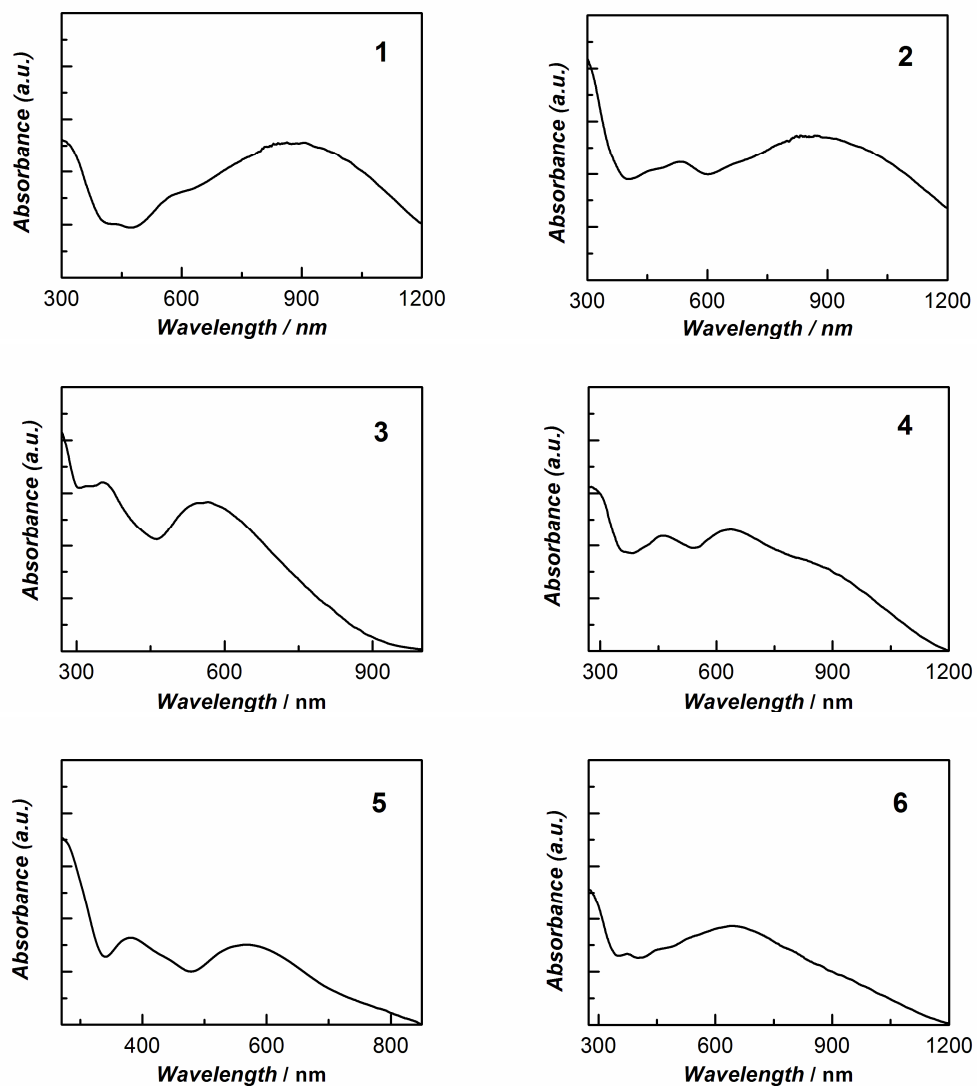

**Figure S1.** UV-vis absorption spectra of 1–6 in the solid state. The spectra were measured by a diffuse reflectance method and converted with a Kubelka-Munk function. Intensities are normalized.

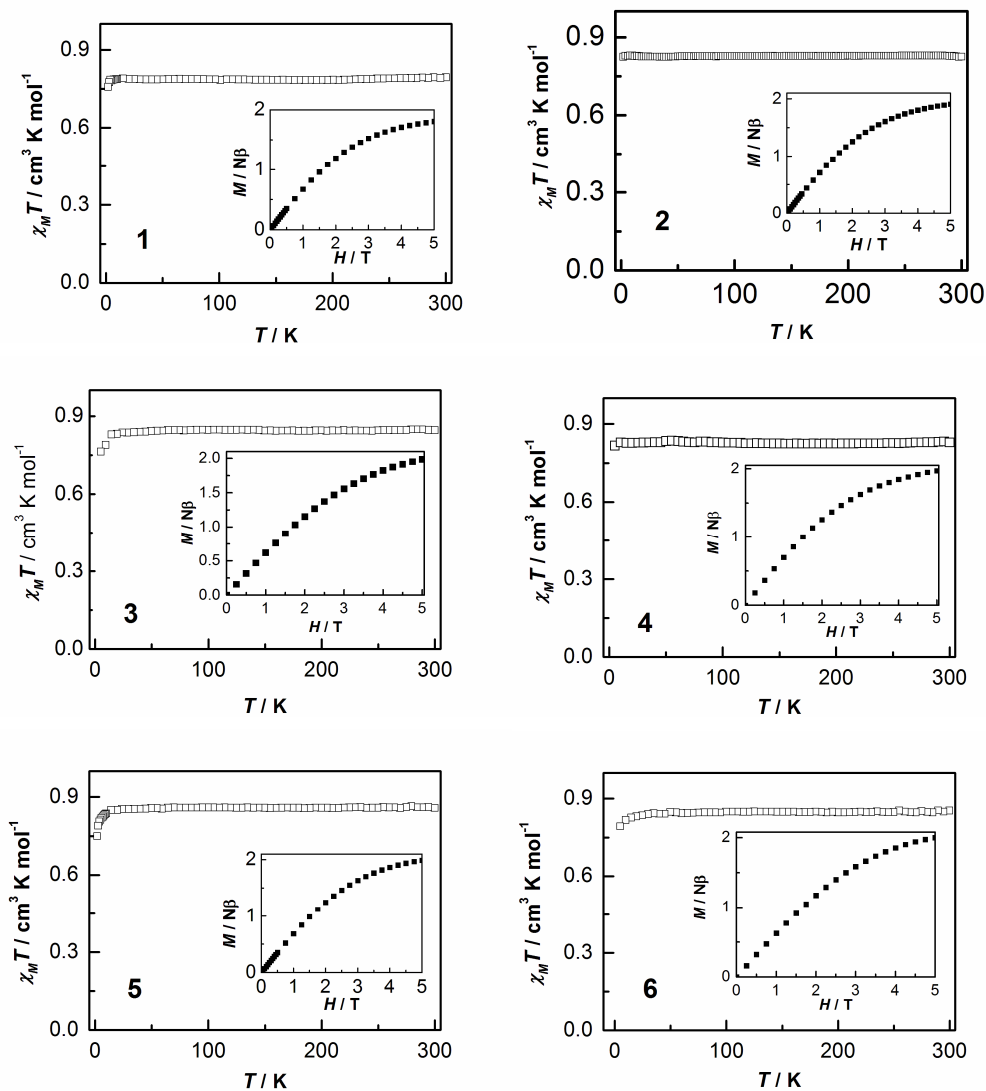

**Figure S2.**  $\chi_M T$  vs.  $T$  plots of 1–6. Inset: Plot of magnetization vs.  $H$  at 2 K.

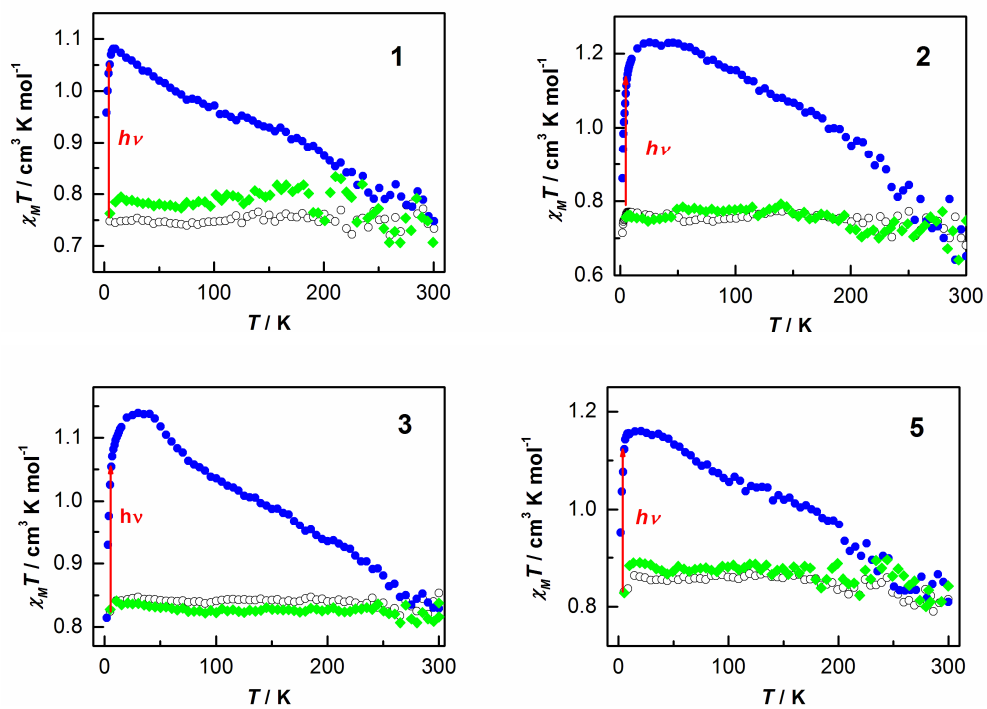

**Figure S3.**  $\chi_M T$  versus  $T$  plots of 1–3 and 5: (○) before irradiation; (●) after irradiation; and (◆) after thermal treatment at 300 K.

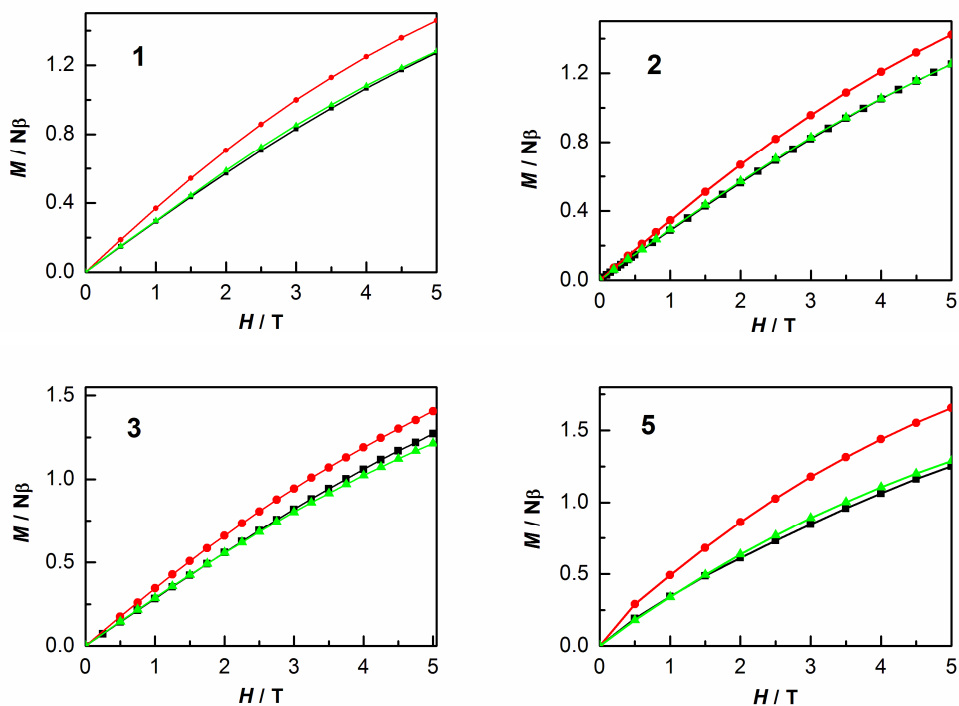

**Figure S4.** Plots of magnetization vs  $H$  of 1–3 and 5 at 5 K upon UV light irradiation: (■) before irradiation; (●) after irradiation; and (▲) after thermal treatment at 300 K. Lines are guides for the eye.

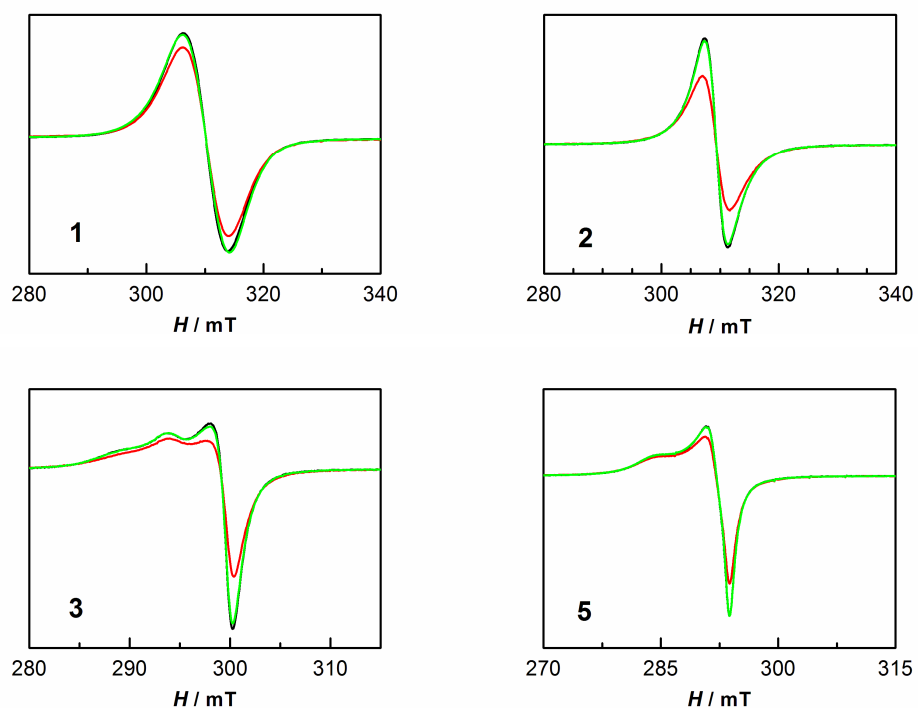

**Figure S5.** ESR spectra of 1–3 and 5 at 77 K upon UV light irradiation: (—) before irradiation; (—) after irradiation; and (—) after thermal treatment at 300 K.
